# Supplementary material for: Hydrogen production via methanol steam reforming using sepiolite-derived Cu-based spherical micro-mesoporous catalysts
Source: Royal Society of Chemistry journal article supplement (doi:10.1039/d4se00526k), 2024-01-01
Supplement: d4se00526k1.pdf [file d4se00526k1.pdf]

## Supplementary information

### Hydrogen production via methanol steam reforming by using sepiolite-derived Cu-based spherical micro-mesoporous catalysts

Mingqiang Chen\*, Jinheng Yao, Yishuang Wang<sup>a</sup>\*, Defang Liang, Lulu Shen, Chuanlong Chen, Chang Li, Haosheng Xin, Gang Yuan, Jun Wang

<sup>a</sup>School of Chemical and Blasting Engineering, Anhui University of Science and Technology, 232001, Huainan, PR China

\*Corresponding Author: Mingqiang Chen (e-mail: [hnitchen@163.com](mailto:hnitchen@163.com), [mqchen@aust.edu.cn](mailto:mqchen@aust.edu.cn)), Yishuang Wang (e-mail: [yswang@aust.edu.cn](mailto:yswang@aust.edu.cn), [ys\\_wang1@163.com](mailto:ys_wang1@163.com))

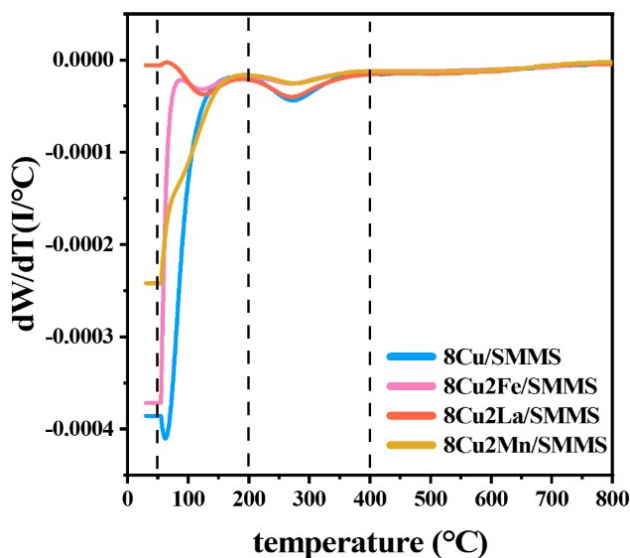

Fig.S1 The DTG curves of spent 8Cu/SMMS, 8Cu2Fe/SMMS, 8Cu2La/SMMS and 8Cu2Mn/SMMS.

**Table S1: The element content in supports and as-prepared catalyst**

| Samples     | element content (%) |      |      |      |       |       |      |
|-------------|---------------------|------|------|------|-------|-------|------|
|             | Cu                  | Fe   | La   | Mn   | Si    | Al    | Mg   |
| SEP         | /                   | /    | /    | /    | 38.97 | 15.19 | 0.22 |
| SSS         | /                   | /    | /    | /    | 34.12 | 14.92 | 0.35 |
| SMMS        | /                   | /    | /    | /    | 52.14 | 0.73  | 0.06 |
| 8Cu/SMMS    | 8.21                | /    | /    | /    | 23.53 | 0.04  | 0.01 |
| 8Cu2Fe/SMMS | 8.16                | 2.25 | /    | /    | 18.95 | 0.04  | 0.01 |
| 8Cu2La/SMMS | 7.99                | /    | 2.19 | /    | 21.23 | 0.03  | 0.01 |
| 8Cu2Mn/SMMS | 8.42                | /    | /    | 1.69 | 31.33 | 0.03  | 0.01 |

**Table S2: Catalyst characterizations**

| Characterization                     | Instruments                                                                 | Test conditions                                                                                                  |
|--------------------------------------|-----------------------------------------------------------------------------|------------------------------------------------------------------------------------------------------------------|
| ICP-OES                              | Agilent TCP-OES 5110 (US)                                                   | Each prepared sample was digested in an acidic solution                                                          |
| XRD                                  | SmartLab SE (Cu K $\alpha$ target, $\lambda = 1.5406 \text{ \AA}$ ) (Japan) | Scanning range: 5-85°; scanning step length rate: 2°/min; operating voltage: 40 kV; current: 40 mA.              |
| SEM                                  | ZEISS G5000 (Germany)                                                       | Operating voltage: 3.0 kV                                                                                        |
| HRTEM                                | Tecnai G2 F20 (USA)                                                         | Dispersing catalysts on carbon grids in ethanol under supersonic wave shaking.                                   |
| N <sub>2</sub> adsorption-desorption | ASAP 2420 (USA)                                                             | Vacuum degassing: 250 °C for 4; the Calculated methods: Brunauer Emmett Teller and Barrett Joiner Halenda (BJH). |

|                                        |                                                                           |                                                                                                                                                                                                                     |
|----------------------------------------|---------------------------------------------------------------------------|---------------------------------------------------------------------------------------------------------------------------------------------------------------------------------------------------------------------|
| H <sub>2</sub> -TPR                    | Auto Chem II<br>2920 (America)                                            | Pretreatment: 50 mL/min Ar flow,<br>200 °C for 1 h; heated to 700 °C/min;<br>10 vol% H <sub>2</sub> /Ar flow (50mL/min)                                                                                             |
| NH <sub>3</sub> (CO <sub>2</sub> )-TPD | Auto Chem II<br>2920 (America)                                            | Pretreatment: 10mL/min He<br>flow, 200 °C for 1 h; reaction: 5 %<br>NH <sub>3</sub> (CO <sub>2</sub> )/He flow, 1 h; washing:<br>10mL/min He flow, 120 °C for 1 h;<br>Record (TCD): 10 °C/min, 120 °C to<br>700 °C. |
| FT-IR                                  | Nicolet 3800<br>(USA)                                                     | All catalysts were separately diluted<br>with the spectral KBr powder;<br>wavelength range: 4000-500 cm <sup>-1</sup> ;<br>resolution: 2 cm <sup>-1</sup>                                                           |
| XPS                                    | ESCALAB 250Xi<br>(monochrome Al<br>K $\alpha$ source:<br>1486.68 eV) (UK) | Beam spot onditions : 150 W<br>and 500 $\mu$ m; internal standard: C1s<br>peak (284.8 eV)                                                                                                                           |
| EPR                                    | Bruker A300<br>(GER)                                                      | Each test was performed with 50<br>mg of sample and evacuated to vacuum<br>prior to measurement.                                                                                                                    |
| TGA                                    | METTLER TGA2<br>(Switzerland)                                             | During the test, the sample was<br>raised from room temperature to 700<br>°C with the heating rate of 10°C/min<br>under 50 mL/min air flow.                                                                         |

**Table S3 Researchers in MSR and the corresponding catalytic activity**

| Catalyst                                | Temperature (°C) | S/C | Feed rate (h <sup>-1</sup> ) or space-time ration | H <sub>2</sub> productivity (mmol·g <sub>cat.</sub> <sup>-1</sup> ·h <sup>-1</sup> ) or selectivity (%) | methanol Conversion (%) | CO selectivity (%) | References |
|-----------------------------------------|------------------|-----|---------------------------------------------------|---------------------------------------------------------------------------------------------------------|-------------------------|--------------------|------------|
| Cu/MCM-41                               | 350              | 3   | 2838 (GHSV)                                       | 99.5                                                                                                    | 82.3                    | 17.7               | [1]        |
| Pd/Al <sub>2</sub> O <sub>3</sub>       | 300              | 2   | 8.5 (WHSV)                                        | S <sub>H2</sub> =99%                                                                                    | 97                      | 2.6                | [2]        |
| 10La10Ni/Al <sub>2</sub> O <sub>3</sub> | 400              | 3   | 1.3 (WHSV)                                        | S <sub>H2</sub> =78%                                                                                    | 100                     | 1                  | [3]        |
| Cu-ZnO/MCM-41                           | 300              | 3   | 1.62 (WHSV)                                       | S <sub>H2</sub> =93.3%                                                                                  | 93.3                    | 1.4                | [4]        |
| Cu-F/AZZ                                | 450              | 3   | 9000 (GHSV)                                       | S <sub>H2</sub> =75%                                                                                    | /                       | 0.3                | [5]        |
| 5RuCe                                   | 400              | 2   | 3.47 (WHSV)                                       | S <sub>H2</sub> =28%                                                                                    | 98                      | 0.13               | [6]        |
| Cu/ZrO <sub>2</sub> -SiO <sub>2</sub>   | 260              | 1.3 | 3500 (GHSV)                                       | 370                                                                                                     | 73                      | 0                  | [7]        |
| 1Cu1Zr/AZ                               | 450              | 1.2 | 10.8 (WHSV)                                       | S <sub>H2</sub> =80%                                                                                    | 75                      | 3.2                | [8]        |
| 8Cu/SMMS                                | 400              | 1.5 | 3.7 (WHSV)                                        | 186.85                                                                                                  | 92.85                   | 57.11              | This work  |

## References

- [1] R.Y. Abrokwah, V.G. Deshmane and D. Kuila, *J Mol Catal A: Chem*, 2016, 425,10–20.
- [2] Y. Khani, N. Kamyar, F. Bahadoran, N. Safari and M.M. Amini, *Renew. Energ.*, 2020, 156, 1055-1064.
- [3] J.C Lu, X.F. Li, S.F He, C.Y. Han, G.P. Wan, Y.Q. Lei, R. Chen, P. Liu, K.Z. Chen, L. Zhang and Y.M. Luo. *Int J Hydrogen Energy*, 2017, 42, 3647–3657.
- [4] Y. Mohtashami and M. Taghizadeh, *Int. J. Hydrogen Energ.*, 2019, 44, 5725–5738.
  
- [5] S. Richa, K. Amit and K.U. Rajesh. *ChemCatChem*, 2019, 11, 4568–4580.
- [6] S. Aouad, C. Gennequin, M. Mrad, H.L. Tidahy, J. Estephane, A. Aboukaïs and E. Abi-Aad, *Int J Energy Res*, 2016, 40, 1287–1292.
- [7] F. Bossola, N. Scotti, F. Somodi, M. Coduri, C. Evangelisti and V.D. Santo, *Appl. Catal. B: Environ.*, 2019, 258, 118016.
  
- [8] M.Q. Chen, G.W. Sun, Y. Wang, D.F. Liang, C. Li, J. Wang and Q. Liu, *Fuel*, 2022, 314, 122733.
